# Supplementary material for: Solvent-free synthesis and room temperature proton conductivity of new cobalt phosphite–oxalates
Source: Royal Society of Chemistry journal article supplement (doi:10.1039/c8ce01198b), 2018-01-01
Supplement: c8ce01198b1.pdf [file c8ce01198b1.pdf]

## **Solvent-free synthesis and room temperature proton conductivity of new cobalt phosphite-oxalates**

Fan Gao<sup>a</sup>, Liangliang Huang<sup>a\*</sup>, Zhijia Xiu<sup>a</sup>, Yanzhen Yin<sup>b</sup>, Yike Ma<sup>a</sup>, Yanfeng Bi<sup>a\*</sup>, Zhiping  
Zheng<sup>a</sup>

<sup>a</sup>School of Chemistry and Material Science, Liaoning Shihua University, Fushun 113001,  
Liaoning, P. R. China.

<sup>b</sup>Guangxi Colleges and Universities Key Laboratory of Beibu Gulf Oil and Natural Gas Resource  
Effective Utilization, Qinzhou University, Qinzhou 535011, China.

\* To whom correspondence should be addressed. E-mail: [huangll@lnpu.edu.cn](mailto:huangll@lnpu.edu.cn) (L. L. Huang);  
[biyanfeng@lnpu.edu.cn](mailto:biyanfeng@lnpu.edu.cn) (Y. F. Bi)

Fig. S1 The IR spectra of compounds **1** and **2**.

Fig. S2 The TG curve of compounds **1** and **2**.

Fig.S3 The asymmetric unit structure of compound **1**.

Fig.S4 The asymmetric unit structure of compound **2**.

Fig. S5 H-bond interactions between guest molecules and the host framework (a) and (b).

Table S1 Crystal data and structure refinement for compound **1** and **2**.

Table S2. Selected bond lengths [ $\text{\AA}$ ] and angles [deg.] for compound **1**.

Table S3. Selected bond lengths [ $\text{\AA}$ ] and angles [deg.] for compound **2**.

Table S4 Hydrogen bonds for compound **1** [ $\text{\AA}$  and deg.].

Table S5 Hydrogen bonds for compound **2** [ $\text{\AA}$  and deg.].

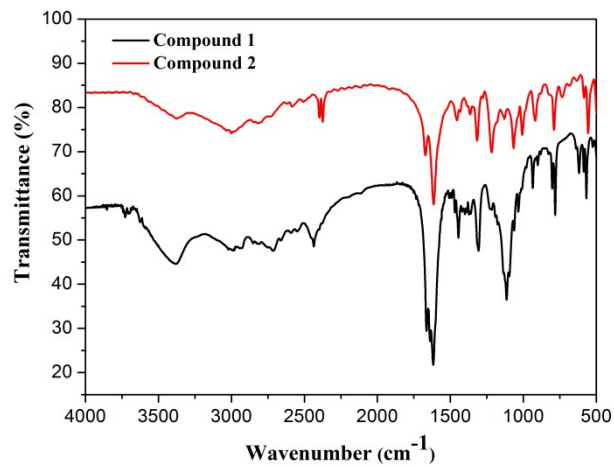

Fig. S1 The IR spectra of compounds 1 and 2.

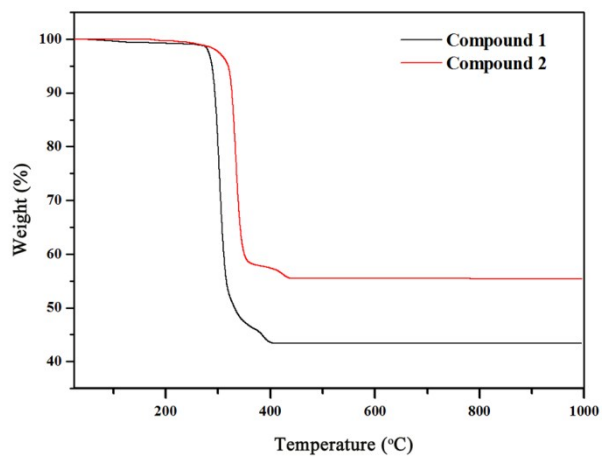

Fig. S2 The TG curve of compounds 1 and 2.

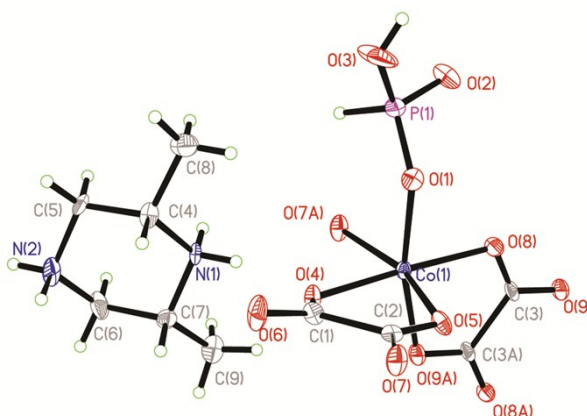

Fig. S3 The asymmetric unit structure of compound 1.

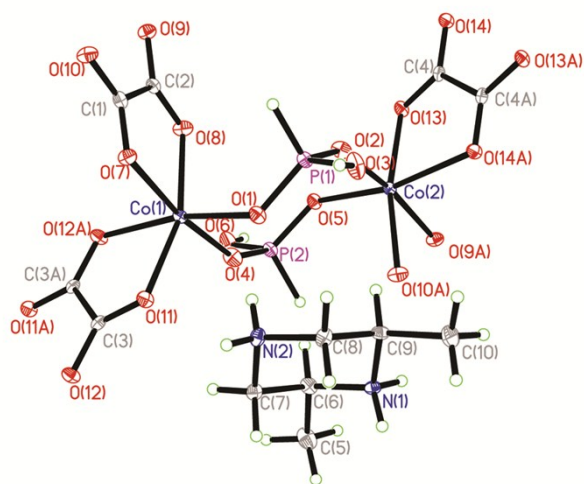

Fig. S4 The asymmetric unit structure of compound 2.

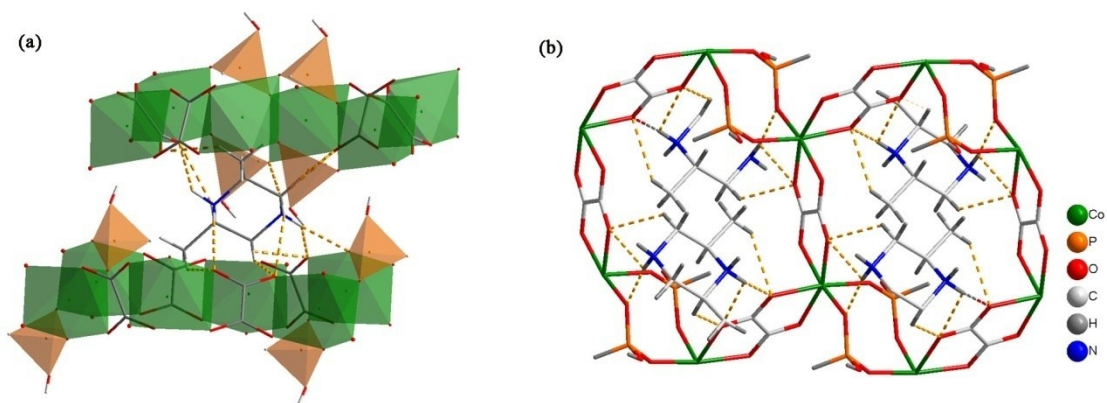

Fig. S5 H-bond interactions between guest molecules and the host framework (a) and (b).

Table S1 Crystal data and structure refinement for compound **1** and **2**

|                                   | <b>1</b>                                                                                                                                    | <b>2</b>                                                                                                                                    |
|-----------------------------------|---------------------------------------------------------------------------------------------------------------------------------------------|---------------------------------------------------------------------------------------------------------------------------------------------|
| Empirical formula                 | C <sub>9</sub> H <sub>18</sub> CoN <sub>2</sub> O <sub>9</sub> P                                                                            | C <sub>10</sub> H <sub>20</sub> Co <sub>2</sub> N <sub>2</sub> O <sub>14</sub> P <sub>2</sub>                                               |
| Formula weight                    | 388.15                                                                                                                                      | 572.08                                                                                                                                      |
| Temperature                       | 296(2) K                                                                                                                                    | 296(2) K                                                                                                                                    |
| Wavelength                        | 0.71073 Å                                                                                                                                   | 0.71073 Å                                                                                                                                   |
| Crystal system. Space group       | Monoclinic, P2 <sub>1</sub> /c                                                                                                              | Monoclinic, P2 <sub>1</sub> /c                                                                                                              |
| Unit cell dimensions              | <i>a</i> = 5.8605(4) Å<br><i>b</i> = 13.6144(9) Å<br><i>c</i> = 19.3605(14) Å<br><i>α</i> = 90°<br><i>β</i> = 105.582(3)°<br><i>γ</i> = 90° | <i>a</i> = 15.3007(9) Å<br><i>b</i> = 8.2832(5) Å<br><i>c</i> = 16.2601(10) Å<br><i>α</i> = 90°<br><i>β</i> = 113.487(2)°<br><i>γ</i> = 90° |
| Volume                            | 1487.95(18) Å <sup>3</sup>                                                                                                                  | 1890.1(2) Å <sup>3</sup>                                                                                                                    |
| Z, Calculated density             | 4, 1.733 g·cm <sup>-3</sup>                                                                                                                 | 4, 2.010 g·cm <sup>-3</sup>                                                                                                                 |
| Absorption coefficient            | 1.308 mm <sup>-1</sup>                                                                                                                      | 2.002 mm <sup>-1</sup>                                                                                                                      |
| F(000)                            | 800                                                                                                                                         | 1160                                                                                                                                        |
| Theta range for data collection   | 2.6 to 25.1°                                                                                                                                | 2.5 to 28.4°                                                                                                                                |
| Refinement method/ unique         | 25325 / 2621 [R(int)=0.135]                                                                                                                 | 21039 / 4730 [R(int)=0.080]                                                                                                                 |
| Refinement method                 | Full-matrix least-squares on F <sup>2</sup>                                                                                                 | Full-matrix least-squares on F <sup>2</sup>                                                                                                 |
| Data/ restraints/ parameters      | 2621 / 0 / 202                                                                                                                              | 4730 / 0 / 273                                                                                                                              |
| Goodness-of-fit on F <sup>2</sup> | 1.058                                                                                                                                       | 1.006                                                                                                                                       |
| Final R indices [I>2σ(I)]         | R1 = 0.0845,<br>wR2 = 0.1963                                                                                                                | R1 = 0.0377,<br>wR2 = 0.0810                                                                                                                |
| R indices (all data)              | R1 = 0.1058,<br>wR2 = 0.2057                                                                                                                | R1 = 0.0565,<br>wR2 = 0.0876                                                                                                                |
| Largest diff. peak and hole       | 1.39 and -0.97e / Å <sup>3</sup>                                                                                                            | 0.59 and -0.93e / Å <sup>3</sup>                                                                                                            |

Table S2. Selected bond lengths [ $\text{\AA}$ ] and angles [deg.] for compound **1**

|                              |          |                                            |          |
|------------------------------|----------|--------------------------------------------|----------|
| Co (1)-O(1)                  | 2.066(6) | Co (1)-O(8)                                | 2.084(6) |
| Co(1)-O(4)                   | 2.038(6) | Co(1)-O(7) <sup>a</sup>                    | 2.093(7) |
| Co(1)-O(5)                   | 2.190(7) | Co(1)-O(9) <sup>b</sup>                    | 2.088(7) |
| P(1)-O(1)                    | 1.499(7) | P(1)-O(3)                                  | 1.538(9) |
| P(1)-O(2)                    | 1.496(8) | P(1)-H(1)                                  | 1.3200   |
| O(1)-Co(1)-O(4)              | 92.2(3)  | O(4)-Co(1)-O(7) <sup>a</sup>               | 82.3(2)  |
| O(1)-Co(1)-O(5)              | 83.2(3)  | O(4)-Co(1)-O(9) <sup>b</sup>               | 98.6(3)  |
| O(1)-Co(1)-O(8)              | 88.8(2)  | O(5)-Co(1)-O(8)                            | 100.6(2) |
| O(1)-Co(1)-O(7) <sup>a</sup> | 94.1(3)  | O(5)-Co(1)-O(7) <sup>a</sup>               | 158.9(2) |
| O(1)-Co(1)-O(9) <sup>b</sup> | 167.6(2) | O(5)-Co(1)-O(9) <sup>b</sup>               | 93.4(3)  |
| O(4)-Co(1)-O(5)              | 76.9(2)  | O(7) <sup>a</sup> -Co(1)-O(8)              | 100.3(2) |
| O(4)-Co(1)-O(8)              | 177.1(3) | O(8)-Co(1)-O(9) <sup>b</sup>               | 80.1(2)  |
| O(1)-P(1)-O(3)               | 109.3(5) | O(7) <sup>a</sup> -Co(1)-O(9) <sup>b</sup> | 93.3(3)  |
| O(1)-P(1)-H(1)               | 108.00   | O(2)-P(1)-O(3)                             | 110.8(5) |
| O(1)-P(1)-O(2)               | 115.7(4) | O(2)-P(1)-H(1)                             | 105.00   |
| O(3)-P(1)-H(1)               | 108.00   |                                            |          |

Symmetry transformations used to generate equivalent atoms: <sup>a</sup> -1+x,y,z ; <sup>b</sup> 1-x, 2-y, 2-z

Table S3. Selected bond lengths [ $\text{\AA}$ ] and angles [deg.] for compound **2**

|                                |            |                                              |            |
|--------------------------------|------------|----------------------------------------------|------------|
| Co(1)-O(1)                     | 2.068(2)   | Co(2)-O(2)                                   | 2.0282(18) |
| Co(1)-O(4)                     | 2.0127(18) | Co(2)-O(5)                                   | 2.067(2)   |
| Co(1)-O(7)                     | 2.1629(19) | Co(2)-O(13)                                  | 2.1263(18) |
| Co(1)-O(8)                     | 2.1209(18) | Co(2)-O(9) <sup>b</sup>                      | 2.1739(18) |
| Co(1)-O(11)                    | 2.1129(18) | Co(2)-O(10) <sup>b</sup>                     | 2.1033(18) |
| Co(1)-O(12) <sup>a</sup>       | 2.170(2)   | Co(2)-O(14) <sup>c</sup>                     | 2.179(2)   |
| P(1)-O(1)                      | 1.512(2)   | P(2)-O(4)                                    | 1.491(2)   |
| P(1)-O(2)                      | 1.4912(19) | P(2)-O(5)                                    | 1.514(2)   |
| P(1)-O(3)                      | 1.573(2)   | P(2)-O(6)                                    | 1.569(3)   |
| P(1)-H(1)                      | 1.2000     | P(2)-H(2)                                    | 1.2500     |
| O(1)-Co(1)-O(4)                | 88.94(8)   | O(2)-Co(2)-O(5)                              | 91.92(8)   |
| O(1)-Co(1)-O(7)                | 87.91(8)   | O(2)-Co(2)-O(13)                             | 95.26(7)   |
| O(1)-Co(1)-O(8)                | 102.85(8)  | O(2)-Co(2)-O(9) <sup>b</sup>                 | 170.95(7)  |
| O(1)-Co(1)-O(11)               | 89.65(8)   | O(2)-Co(2)-O(10) <sup>b</sup>                | 93.98(7)   |
| O(1)-Co(1)-O(12) <sup>a</sup>  | 166.76(7)  | O(2)-Co(2)-O(14) <sup>c</sup>                | 89.07(8)   |
| O(4)-Co(1)-O(7)                | 171.97(8)  | O(5)-Co(2)-O(13)                             | 88.31(8)   |
| O(4)-Co(1)-O(8)                | 96.94(7)   | O(5)-Co(2)-O(9) <sup>c</sup>                 | 88.08(8)   |
| O(4)-Co(1)-O(11)               | 97.73(7)   | O(5)-Co(2)-O(10) <sup>c</sup>                | 100.42(8)  |
| O(4)-Co(1)-O(12) <sup>a</sup>  | 92.01(8)   | O(5)-Co(2)-O(14) <sup>c</sup>                | 164.80(7)  |
| O(7)-Co(1)-O(8)                | 76.59(7)   | O(9) <sup>b</sup> -Co(2)-O(13)               | 93.78(7)   |
| O(7)-Co(1)-O(11)               | 89.64(7)   | O(10) <sup>b</sup> -Co(2)-O(13)              | 167.07(7)  |
| O(7)-Co(1)-O(12) <sup>a</sup>  | 92.74(7)   | O(13)-Co(2)-O(14) <sup>c</sup>               | 76.50(7)   |
| O(8)-Co(1)-O(11)               | 160.86(7)  | O(9) <sup>b</sup> -Co(2)-O(10) <sup>b</sup>  | 77.13(7)   |
| O(8)-Co(1)-O(12) <sup>a</sup>  | 90.15(8)   | O(9) <sup>b</sup> -Co(2)-O(14) <sup>c</sup>  | 93.31(7)   |
| O(11)-Co(1)-O(12) <sup>a</sup> | 77.13(7)   | O(10) <sup>b</sup> -Co(2)-O(14) <sup>c</sup> | 94.64(8)   |
| O(1)-P(1)-O(2)                 | 118.20(12) | O(4)-P(2)-O(5)                               | 118.05(12) |
| O(1)-P(1)-O(3)                 | 109.84(11) | O(4)-P(2)-O(6)                               | 107.25(12) |
| O(2)-P(1)-O(3)                 | 107.99(12) | O(5)-P(2)-O(6)                               | 110.58(12) |
| O(2)-P(1)-H(1)                 | 107.00     | O(6)-P(2)-H(2)                               | 103.00     |
| O(3)-P(1)-H(1)                 | 98.00      | O(4)-P(2)-H(2)                               | 107.00     |
| O(1)-P(1)-H(1)                 | 113.00     | O(5)-P(2)-H(2)                               | 109.00     |

Symmetry transformations used to generate equivalent atoms: <sup>b</sup> x, 1+y,z; <sup>a</sup> 1-x, 1-y, 1-z; <sup>c</sup> 2-x,2-y,

2-z

Table S4 Hydrogen bonds for compound **1** [Å and deg.]

| D-H...A           | d(D-H) | d(H...A) | D(D...A)  | <DHA   |
|-------------------|--------|----------|-----------|--------|
| N(1)-H(1A)...O(6) | 0.89   | 1.82     | 2.701(11) | 170.0  |
| N(1)-H(1B)...O(4) | 0.89   | 1.78     | 2.658(10) | 167.0  |
| N(2)-H(2A)...O(2) | 0.89   | 2.02     | 2.807(11) | 147.0  |
| N(2)-H(2B)...O(1) | 0.89   | 2.00     | 2.838(10) | 157.0  |
| N(2)-H(2B)...O(5) | 0.89   | 2.41     | 2.993(10) | 124.0  |
| O(3)-H(3)...O(2)  | 0.85   | 1.69     | 2.524(11) | 168.00 |
| C(5)-H(5A)...O(8) | 0.97   | 2.51     | 3.171(12) | 125.0  |
| C(7)-H(7)...O(3)  | 0.98   | 2.38     | 3.099(14) | 129.0  |
| C(8)-H(8B)...O(9) | 0.96   | 2.54     | 3.319(13) | 138.0  |

Table S5 Hydrogen bonds for compound **2** [Å and deg.]

| D-H...A             | d(D-H) | d(H...A) | D(D...A) | <DHA   |
|---------------------|--------|----------|----------|--------|
| N(1)-H(1A)...O(7)   | 0.89   | 1.94     | 2.777(3) | 155.0  |
| N(1)-H(1B)...O(9)   | 0.89   | 1.96     | 2.822(3) | 161.0  |
| N(2)-H(2A)...O(1)   | 0.89   | 1.95     | 2.831(3) | 170.0  |
| N(2)-H(2A)...O(11)  | 0.89   | 2.56     | 2.970(3) | 109.0  |
| N(2)-H(2B)...O(5)   | 0.89   | 1.94     | 2.803(3) | 163.0  |
| N(2)-H(2B)...O(13)  | 0.89   | 2.46     | 2.913(3) | 112.0  |
| O(3)-H(3A)...O(14)  | 0.85   | 1.83     | 2.674(3) | 169.00 |
| O(6)-H(6A)...O(12)  | 0.85   | 1.84     | 2.665(3) | 164.00 |
| C(5)-H(5A)...O(7)   | 0.96   | 2.53     | 3.230(4) | 130.0  |
| C(7)-H(7A)...O(11)  | 0.97   | 2.37     | 3.048(3) | 127.0  |
| C(7)-H(7B)...O(8)   | 0.97   | 2.37     | 3.244(3) | 149.0  |
| C(8)-H(8A)...O(8)   | 0.97   | 2.50     | 3.332(3) | 144.0  |
| C(8)-H(8B)...O(13)  | 0.97   | 2.35     | 2.986(3) | 123.0  |
| C(9)-H(9)...O(10)   | 0.98   | 2.50     | 3.193(3) | 127.0  |
| C(10)-H(10A)...O(9) | 0.96   | 2.53     | 3.262(4) | 134.0  |
